# Supplementary material for: Interfacial anion vacancy engineered graphitic carbon nitride photoelectrode for promoting charge separation
Source: Royal Society of Chemistry journal article supplement (doi:10.1039/d2cy02089k), 2023-01-01
Supplement: d2cy02089k1.pdf [file d2cy02089k1.pdf]

Electronic supporting Information

**Interfacial Anion Vacancies Engineered Graphitic Carbon Nitride Photoelectrode  
for Promoting Charge Separation**

P.V.R.K. Ramacharyulu <sup>a</sup> and Chang Woo Kim <sup>a,b,\*</sup>

<sup>a</sup> *Department of Nanotechnology Engineering, College of Engineering, Pukyong National University, Busan, 48513, Republic of Korea.*

<sup>b</sup> *Department of Smart Green Technology Engineering, Pukyong National University, Busan 48513, Republic of Korea.*

*Correspondence and requests for materials should be addressed to Chang Woo Kim (kimcw@pknu.ac.kr)*

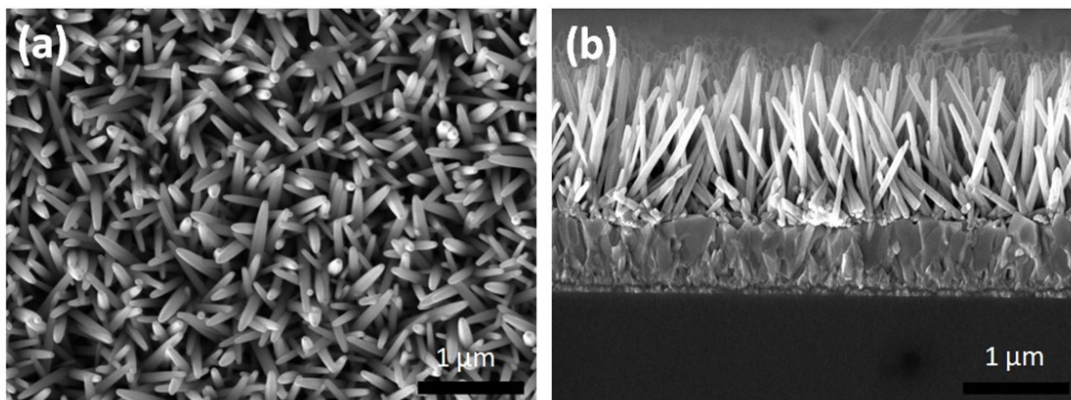

**Figure S1.** Top viewed (a) and cross-sectional SEM images (b) of ZnO nanorod.

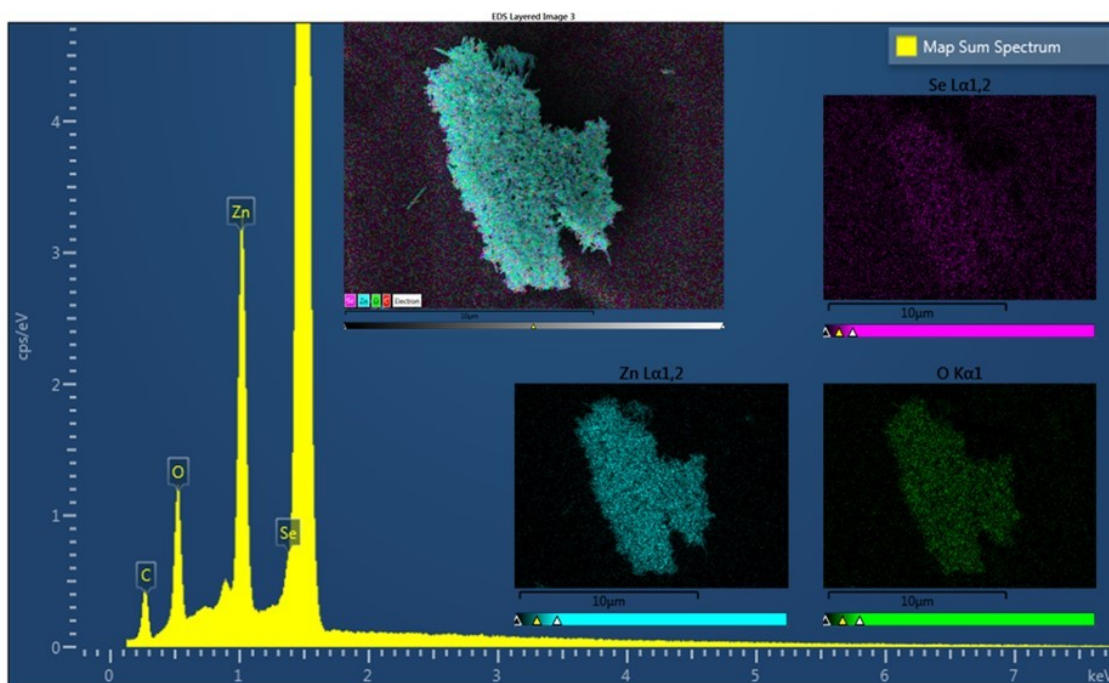

**Figure S2.** EDS results of ZnO@ZnSe in Figure 2(a). The EDS images recorded on a scale of 10 μm.

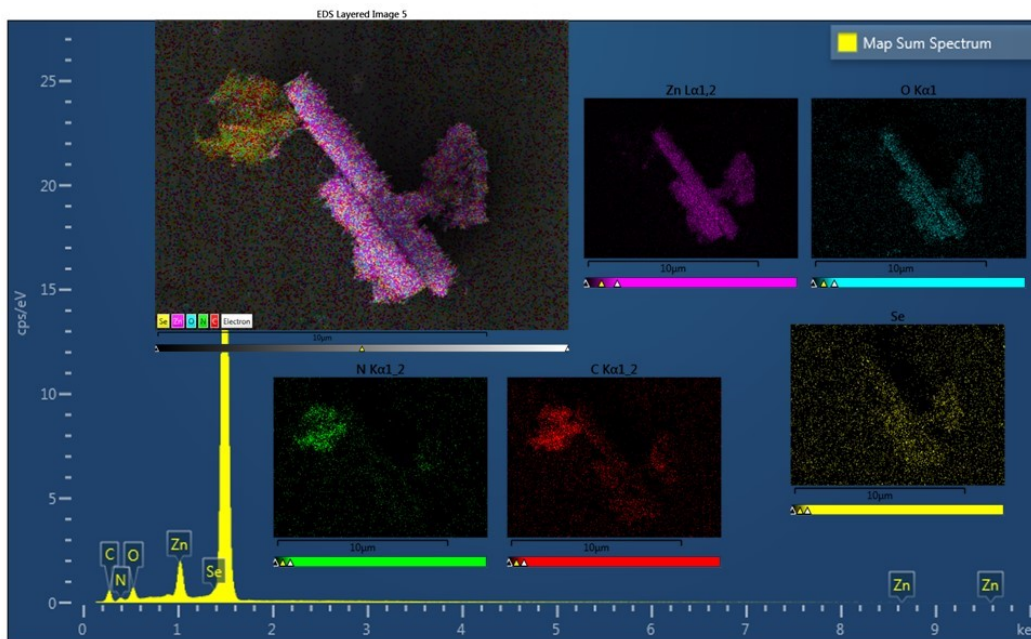

**Figure S3.** EDS of ZnO@ZnSe@g-C<sub>3</sub>N<sub>4</sub> in Figure 2(b). The EDS images recorded on a scale of 10 μm.

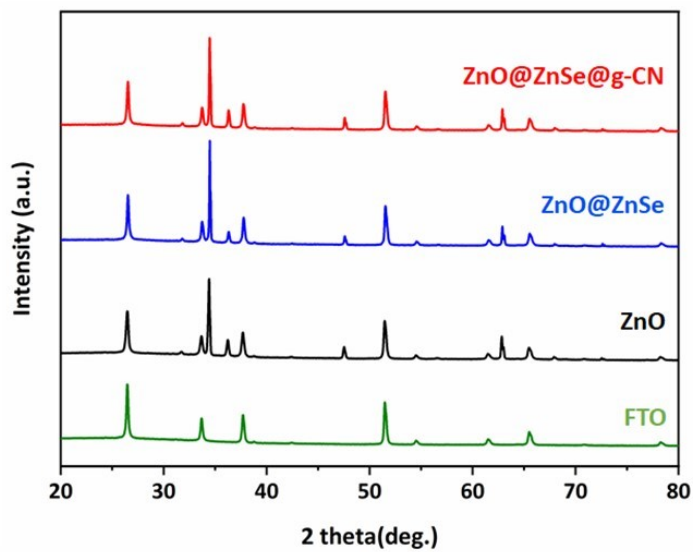

**Figure S4.** XRD result of FTO (green), ZnO (black), ZnO@ZnSe (blue) and ZnO@ZnSe@g-C<sub>3</sub>N<sub>4</sub> (red).

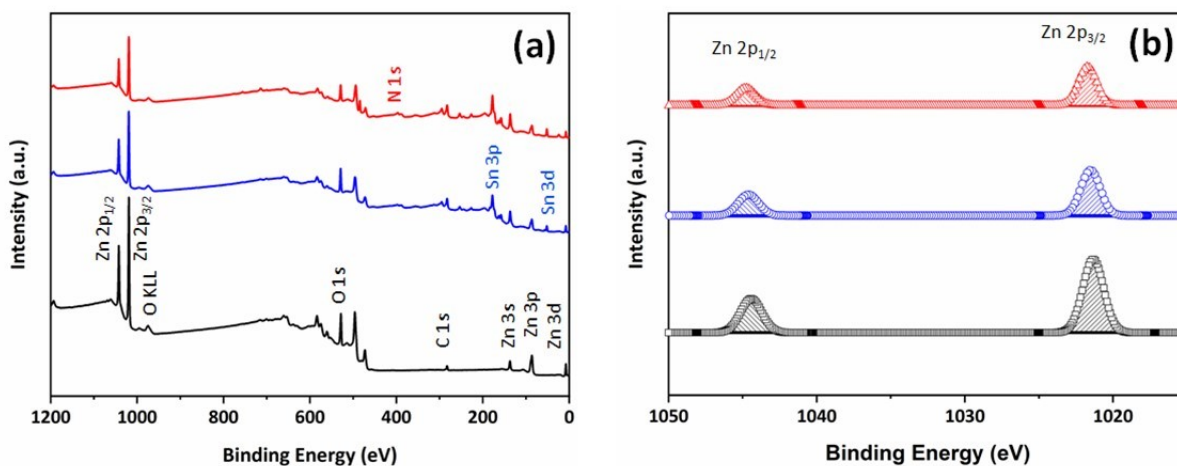

**Figure S5.** XPS spectra of wide range (a) and binding energy of Zn (b) in ZnO (black), ZnO@ZnSe (blue) and ZnO@ZnSe@g-C<sub>3</sub>N<sub>4</sub> (red).

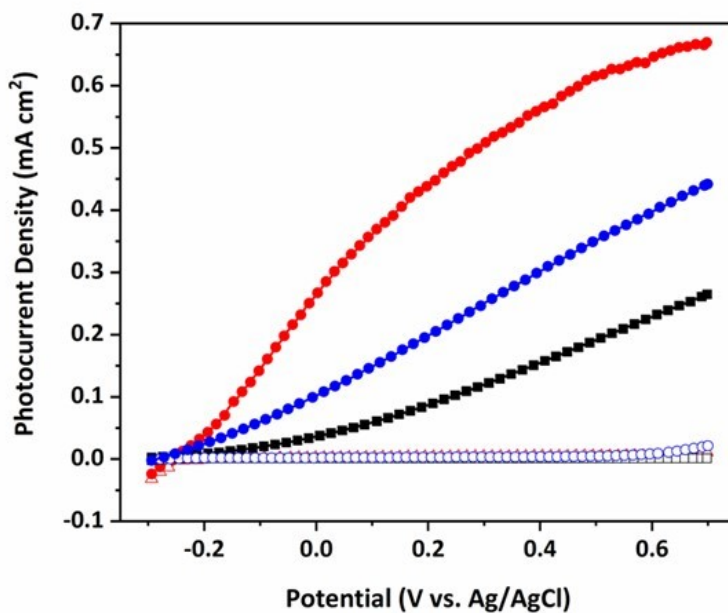

**Figure S6.** LSV of ZnO (black), ZnO@ZnSe (blue) and ZnO@ZnSe@g-C<sub>3</sub>N<sub>4</sub> (red) under dark (empty mark) and under illumination (filled mark).

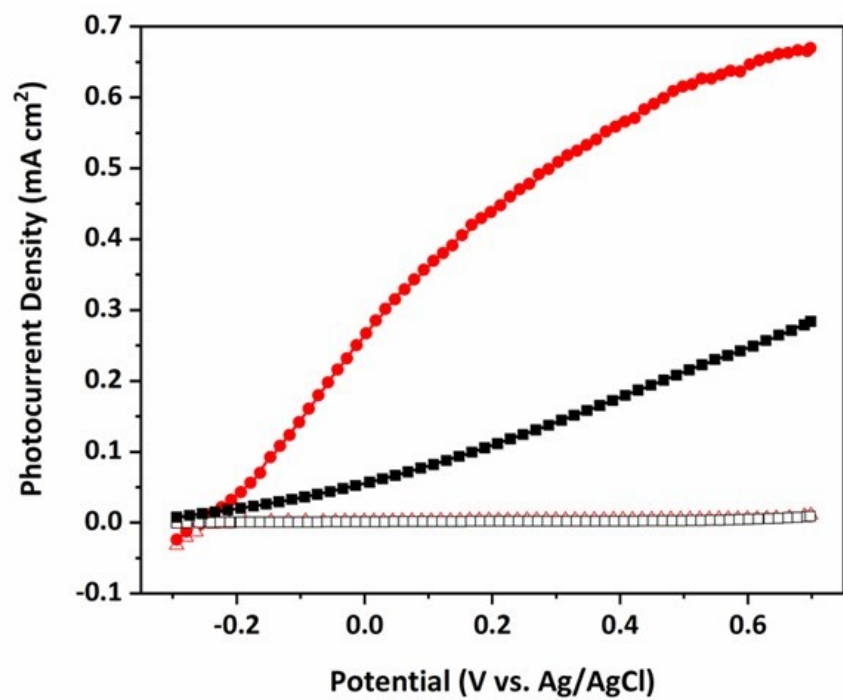

**Figure S7.** LSV of ZnO@ZnSe@g-C<sub>3</sub>N<sub>4</sub> in N<sub>2</sub> treatment (red) and in air treatment (black).

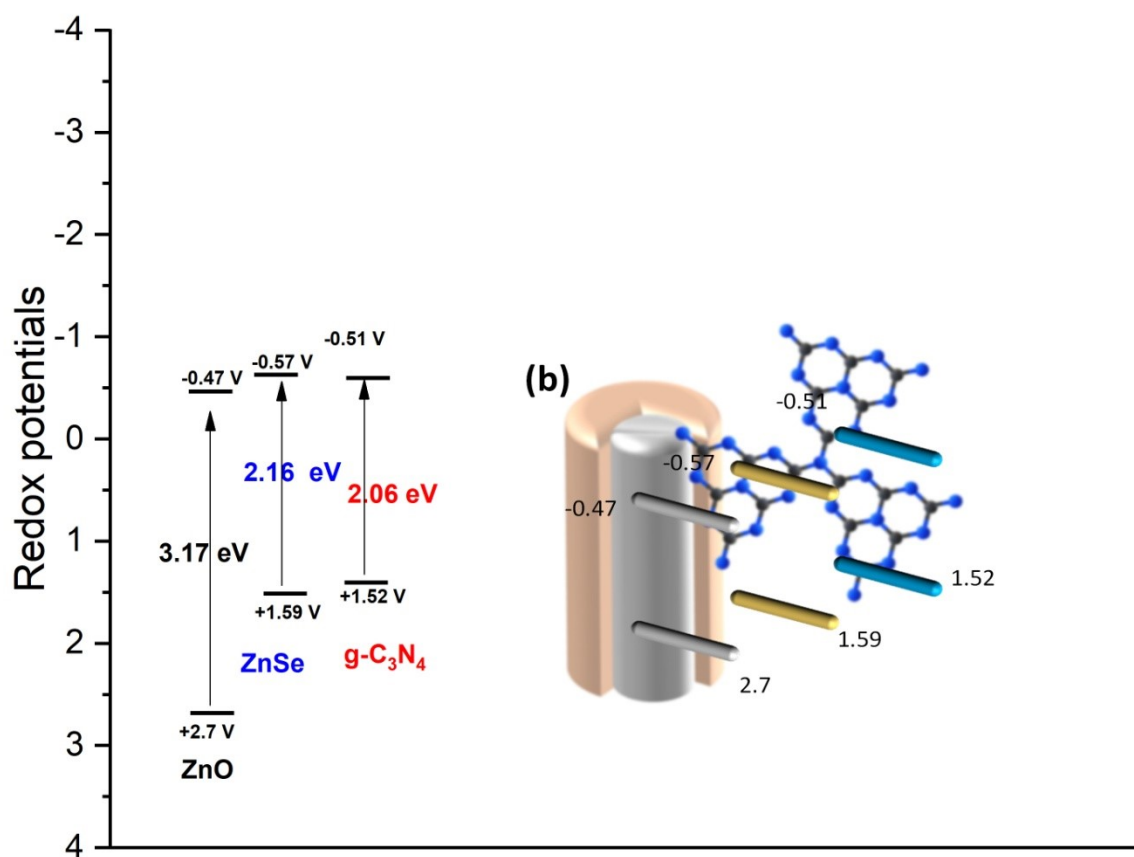

**Figure S8.** Band diagram of ZnO, ZnSe and g-C<sub>3</sub>N<sub>4</sub> of Figure 8(b).
